# Supplementary material for: Magnetic field directed assembly of two-dimensional fractal colloidal aggregates
Source: Royal Society of Chemistry journal article supplement (doi:10.1039/c3sm50306b), 2013-01-01
Supplement: c3sm50306b.pdf [file c3sm50306b.pdf]

*Supplementary Information*

**Magnetic Field Directed Assembly of Two-Dimensional Fractal Colloidal Aggregates**

Julie Byrom and Sibani Lisa Biswal

Department of Chemical and Biomolecular Engineering, Rice University, Houston, Texas 77005,  
USA

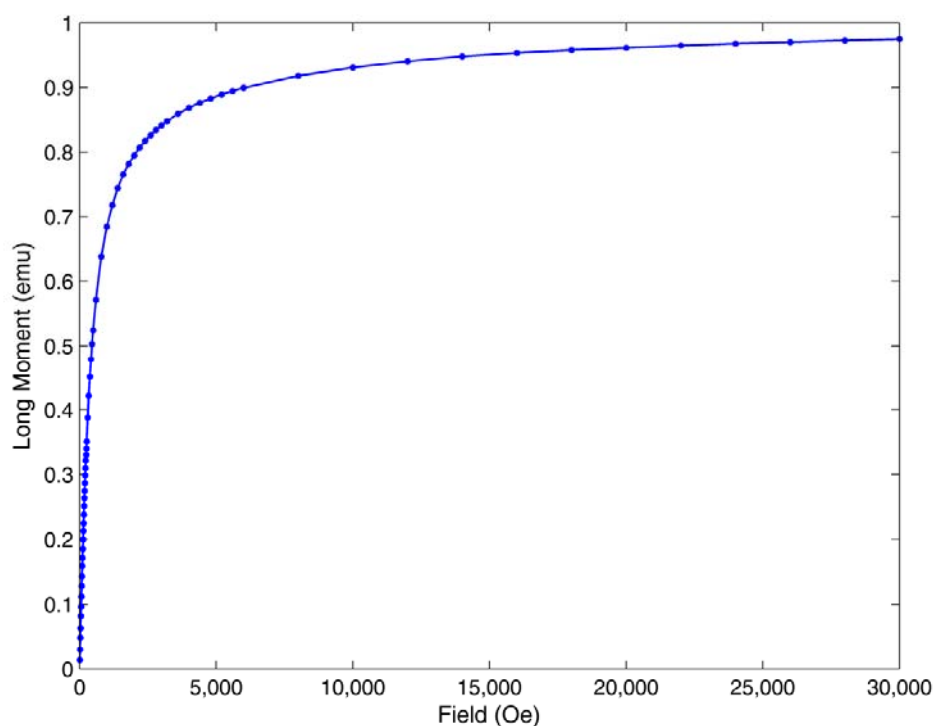

**Fig. S1** M-H curve of a 16.5mg dry sample of the ferrofluid used in experiments, measured using a SQUID magnetometer. The data yields a saturated moment of  $\mu_s = 0.98\text{emu}$ , which can then be converted to a saturated magnetization of  $M_s = 307\text{ kA/m}$

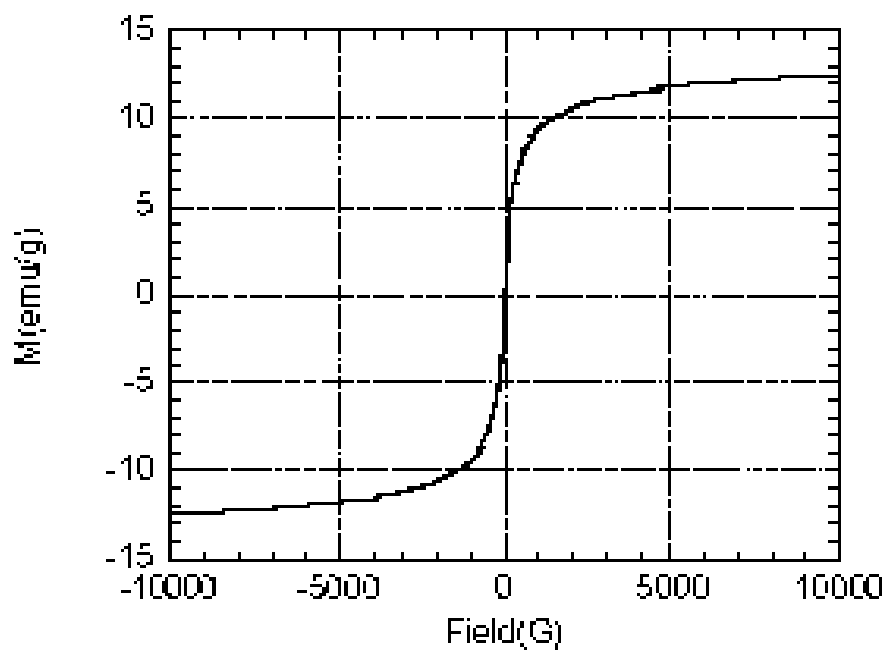

**Fig. S2** M-H curve provided by Invitrogen for the paramagnetic beads (Dynabeads M-270). Also provided was a value for the magnetic (mass) susceptibility of  $\chi_p = 6 \times 10^{-4} \text{ m}^3/\text{kg}$ , which can be converted to a magnetic (volume) susceptibility of  $\chi_p = 0.96$ .
